# Supplementary material
Source: PubMed Central journal article supplement (PMC3650728)

| <b>Supplementary Table 1 B[a]P Radical cation mutants</b> |              |                 |                  |
|-----------------------------------------------------------|--------------|-----------------|------------------|
| <b>Sample #</b>                                           | <b>Codon</b> | <b>Mutation</b> | <b>AA Change</b> |
| RC-1                                                      | 151          | CCC>GCC         | Pro>Ala          |
| RC-2                                                      | 242          | TGC>TCC         | Cys>Ser          |
| RC-3                                                      | 180          | GAG>CAG         | Glu>Gln          |
| RC-4                                                      | 196          | CGA>GGA         | Arg>Gly          |
| RC-5                                                      | 285          | GAG>TAG         | Glu>Stop         |
| RC-6                                                      | 297          | CAC>GAC         | His>Asp          |
| RC-7                                                      | 232          | ATC>AGC         | Ile>Ser          |
| RC-8                                                      | 280          | AGA>ACA         | Arg>Thr          |
| RC-9                                                      | 265          | CTG>CAG         | Leu>Gln          |
| RC-10                                                     | 251          | ATC>ACC         | Ile>Thr          |
| RC-11                                                     | 152          | CCC>CCG         | Pro>Pro          |
| RC-12                                                     | 232          | ATC>AGC         | Ile>Ser          |
| RC-13                                                     | 152          | CCG>CTG         | Pro>Leu          |
| RC-14                                                     | 152          | CCG>CTG         | Pro>Leu          |
| RC-15                                                     | 278          | CCT>TCT         | Pro>Ser          |
| RC-16                                                     | 177          | CCC>ACC         | Pro>Thr          |
| RC-17                                                     | 152          | CCG>CTG         | Pro>Leu          |
| RC-18                                                     | 251          | ATC>GTC         | Ile>Val          |
| RC-19                                                     | 144          | CAG>CCG         | Gln>Pro          |
| RC-20                                                     | 281          | GAC>TAC         | Asp>Tyr          |
| RC-21                                                     | 243          | ATG>ATC         | Met>Ile          |
| RC-22                                                     | 278          | CCT>TCT         | Pro>Ser          |
| RC-23                                                     | 309          | GAC>CAC         | Asp>His          |
| RC-24                                                     | 280          | AGA>ATA         | Arg>Ile          |
| RC-25                                                     | 178          | CAC>AAC         | His>Asn          |
| RC-26                                                     | 161          | GCC>GAC         | Ala>Asp          |
| RC-27                                                     | 142          | CCT>ACT         | Pro>Thr          |
| RC-28                                                     | 256          | ACA>ACC         | Thr>Thr          |
| RC-29                                                     | 154          | GGC>TGC         | Gly>Cys          |
| RC-30                                                     | 177          | CCC>CAC         | Pro>His          |
| RC-31                                                     | 155          | ACC>AAC         | Thr>Asn          |
| RC-32                                                     | 154          | GGC>TGC         | Gly>Cys          |
| RC-33                                                     | 234          | TAC>GAC         | Tyr>Asp          |
| RC-34                                                     | 159          | GCC>CCC         | Ala>Pro          |
| RC-35                                                     | 351          | AAG>GAG         | Lys>Glu          |

| <b>Supplementary Table 2 B[a]P 1,6 Dione mutants</b> |              |                 |                  |
|------------------------------------------------------|--------------|-----------------|------------------|
| <b>Sample #</b>                                      | <b>Codon</b> | <b>Mutation</b> | <b>AA Change</b> |
| 1,6-1                                                | 288          | AAT>GAU         | Asn> Asp         |
| 1,6-4                                                | 264          | CTA>TTA         | leu> Leu         |
| 1,6-7                                                | 238          | TGT>CGT         | Cys> Arg         |
| 1,6-8                                                | 315          | TCT>TTT         | Ser> Phe         |
| 1,6-9                                                | 196          | CGA>CCA         | Arg> Pro         |
| 1,6-10                                               | 238          | TGT>CGT         | Cys> Arg         |
| 1,6-11                                               | 177          | CCC>CTC         | Pro> leu         |
| 1,6-18                                               | 153          | CCC>CAC         | Pro>His          |
| 1,6-18                                               | 154          | GGC>AGC         | Gly>Ser          |
| 1,6-20                                               | 196          | CGA>CCA         | Arg> Pro         |
| 1,6-21                                               | 68           | GAG>TAG         | Glu> STOP        |
| 1,6-22                                               | 68           | GAG>TAG         | Glu> STOP        |
| 1,6-23                                               | 142          | CCT>ACT         | Pro> Thr         |
| 1,6- 29                                              | 283          | CGC>CAC         | Arg> His         |
| 1,6-33                                               | 127          | TCC>CCC         | Ser> Pro         |
| 1,6-37                                               | 220          | TAT>TGT         | Tyr> Cys         |
| 1,6-57                                               | 291          | AAG>AAT         | Lys>Asn          |
| 1,6-60                                               | 126          | TAC>CAC         | Tyr> His         |
| 1,6-61                                               | 312          | ACC>TCC         | Thr> Ser         |
| 1,6-63                                               | 291          | AAG>AAT         | Lys>Asn          |
| 1,6-65                                               | 267          | CGG>CAG         | Arg> Gln         |
| 1,6-71                                               | 117          | GGG>GTG         | Gly> Gly         |
| 1,6-81                                               | 281          | GAC>AAC         | Asp> Asn         |
| 1,6-82                                               | 161          | GCC>TCC         | Ala> Ser         |
| 1,6-83                                               | 168          | CAC>CAT         | His> His         |
| 1,6-83                                               | 175          | CGC>CAC         | Arg> His         |
| 1,6-85                                               | 257          | CTG>CAG         | Leu> Gln         |
| 1,6-86                                               | 198          | GAA>TAA         | Glu> STOP        |
| 1,6-87                                               | 236          | TAC>TAA         | Tyr> STOP        |
| 1,6-89                                               | 236          | TAC>TAA         | TYR> STOP        |
| 1,6-90                                               | 198          | GAA>TAA         | Glu> STOP        |
| 1,6-91                                               | 276          | GCC>GAC         | Ala> Asp         |
| 1,6-91                                               | 296          | CAC>CAA         | His> Gln         |
| 1,6-94                                               | 248          | CGG>CAG         | Arg> Gln         |

| <b>Supplementary Table 3 B[a]P 3,6 dione mutants</b> |              |                 |                  |
|------------------------------------------------------|--------------|-----------------|------------------|
| <b>Sample #</b>                                      | <b>Codon</b> | <b>Mutation</b> | <b>AA Change</b> |
| 3,6-2                                                | TAC>AAC      | 163             | Trp>STOP         |
| 3,6-6                                                | ATG>ATA      | 246             | Met>Ile          |
| 3,6-12                                               | GCC>GTC      | 276             | Ala>Val          |
| 3,6-13                                               | CCC>CTC      | 151             | Pro>Leu          |
| 3,6-14                                               | GGG>GAG      | 302             | Gly>Glu          |
| 3,6-15                                               | CGG>CAG      | 267             | Arg>Gln          |
| 3,6-16                                               | CCC>TCC      | 151             | Pro>Ser          |
| 3,6-17                                               | AGC>ATC      | 303             | Ser>Ile          |
| 3,6-19                                               | CGC>CAC      | 181             | Arg>His          |
| 3,6-20                                               | CTG>CCG      | 145             | Leu>Pro          |
| 3,6-25                                               | TCT>CCT      | 121             | Ser>Pro          |
| 3,6-35                                               | CGC>CAC      | 158             | Arg>His          |
| 3,6-39                                               | CGC>CTC      | 158             | Arg>Leu          |
| 3,6-40                                               | TGC>TGA      | 141             | Cys>STOP         |
| 3,6-46                                               | GCC>GTC      | 276             | Ala>Val          |
| 3,6-49                                               | AAG>AAT      | 139             | Lys> Asn         |
| 3,6-51                                               | TGC>TGA      | 176             | Cys>STOP         |
| 3,6-55                                               | TGC>TGA      | 176             | Cys>STOP         |
| 3,6-67                                               | TGG>TAG      | 146             | Trp>STOP         |
| 3,6-68                                               | CGC>CGA      | 156             | Arg>Arg          |
| 3,6-68                                               | TGG>TAG      | 146             | Trp>STOP         |
| 3,6-69                                               | CCT>CUT      | 223             | Pro>Leu          |
| 3,6-69                                               | CGC>CAC      | 181             | Arg>His          |
| 3,6-72                                               | GAT>CAT      | 148             | Asp>His          |
| 3,6-72                                               | TCC>TCA      | 149             | Ser>Ser          |
| 3,6-73                                               | CGC>CAC      | 181             | Arg>His          |
| 3,6-74                                               | CGT>GGT      | 273             | Arg>Gly          |
| 3,6-74                                               | CGC>CAC      | 181             | Arg>His          |
| 3,6-76                                               | CGT>AGT      | 273             | Arg>Ser          |
| 3,6-79                                               | CCC>ACC      | 219             | Pro>Thr          |
| 3,6-79                                               | AAG>AAT      | 291             | Lys> Asn         |

Supplementary Figure 1

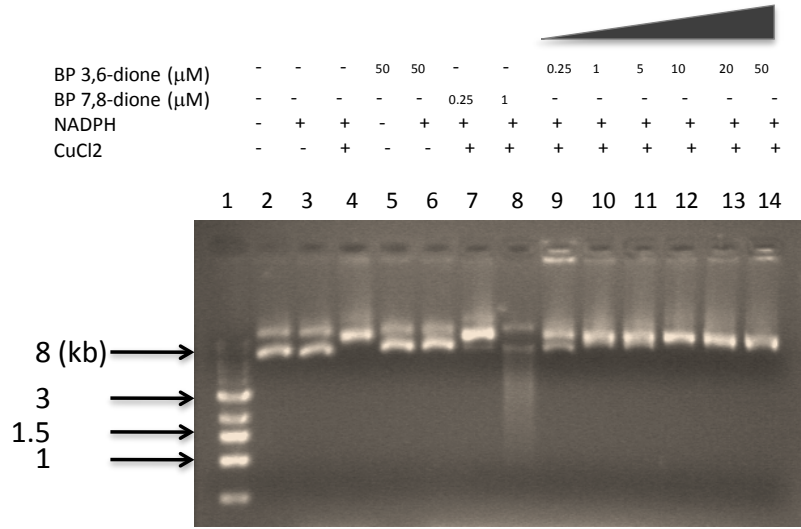

Supplement: NIHMS400177-supplement-1_si_001.pdf [file NIHMS400177-supplement-1_si_001.pdf]
